# Supplementary material for: Conventional versus nerve-sparing radical surgery for cervical cancer: a meta-analysis
Source: PubMed Central journal article supplement — J Gynecol Oncol. 2015 Apr 9;26(2):100–10. doi: 10.3802/jgo.2015.26.2.100 (PMC4397225; doi:10.3802/jgo.2015.26.2.100), 2015-04-09
Supplement: jgo-26-100-s009.pdf [file jgo-26-100-s009.pdf]

**Supplementary Table 5.** Subgroup analyses for comparing postoperative sexual functions between conventional and nerve sparing radical surgery for cervical cancer

| Category                                                       | No. of studies | OR    | 95% CI      | Heterogeneity |                | Model used     |
|----------------------------------------------------------------|----------------|-------|-------------|---------------|----------------|----------------|
|                                                                |                |       |             | p-value       | I <sup>2</sup> |                |
| Decrease of sexual interest                                    |                |       |             |               |                |                |
| Study design                                                   |                |       |             |               |                |                |
| Prospective                                                    | 2              | 0.305 | 0.043–2.170 | 0.055         | 72.839         | Random effects |
| Retrospective                                                  | 3              | 0.774 | 0.467–1.281 | 0.461         | <0.001         | Fixed effect   |
| Quality of study (NOS)                                         |                |       |             |               |                |                |
| ≥8                                                             | 4              | 0.480 | 0.194–1.185 | 0.011         | 73.057         | Random effects |
| Surgical approach                                              |                |       |             |               |                |                |
| Laparotomy                                                     | 3              | 0.911 | 0.532–1.560 | 0.967         | <0.001         | Fixed effect   |
| Radicality                                                     |                |       |             |               |                |                |
| Type III or C                                                  | 4              | 0.786 | 0.484–1.277 | 0.659         | <0.001         | Fixed effect   |
| Follow-up for evaluating dysfunctions (mo)                     |                |       |             |               |                |                |
| 12                                                             | 4              | 0.440 | 0.166–1.166 | 0.020         | 69.574         | Random effects |
| Adjustment for potential confounding factors                   |                |       |             |               |                |                |
| Age, adjuvant treatment, FIGO stage                            | 4              | 0.480 | 0.194–1.185 | 0.011         | 73.057         | Random effects |
| Age, adjuvant treatment, extent of lymphadenectomy, FIGO stage | 3              | 0.378 | 0.112–1.269 | 0.017         | 75.327         | Random effects |
| Dyspareunia                                                    |                |       |             |               |                |                |
| Surgical approach                                              |                |       |             |               |                |                |
| Laparotomy                                                     | 2              | 0.763 | 0.408–1.426 | 0.449         | <0.001         | Fixed effect   |
| Radicality                                                     |                |       |             |               |                |                |
| Type III or C                                                  | 2              | 0.711 | 0.389–1.298 | 0.530         | <0.001         | Fixed effect   |
| Follow-up for evaluating dysfunctions (mo)                     |                |       |             |               |                |                |
| 12                                                             | 2              | 0.504 | 0.223–1.138 | 0.754         | <0.001         | Fixed effect   |
| Adjustment for potential confounding factors                   |                |       |             |               |                |                |
| Age, adjuvant treatment, extent of lymphadenectomy, FIGO stage | 3              | 0.759 | 0.350–1.648 | 0.467         | 75.327         | Fixed effect   |

CI, confidence interval; FIGO, International Federation of Gynecology and Obstetrics; NOS, the Newcastle-Ottawa Scale; OR, odds ratio.
